# Supplementary material for: A new temperature-photoperiod coupled phenology module in LPJ-GUESS model v4.1: optimizing estimation of terrestrial carbon and water processes
Source: Copernicus journal article supplement (doi:10.5194/gmd-2023-212), 2023-11-10
Supplement: Supplementary file 1 [file gmd-2023-212-supplement.pdf]

1 **Supplementary information**

2 **Figure S1 vegetation phenology based on remote sensing.** (a) Spring phenology, (b)  
3 autumn phenology, (c) the change trend of spring phenology (SOS), and (d) the change  
4 trend of autumn phenology. The dots represent regions with significant change trend.  
5

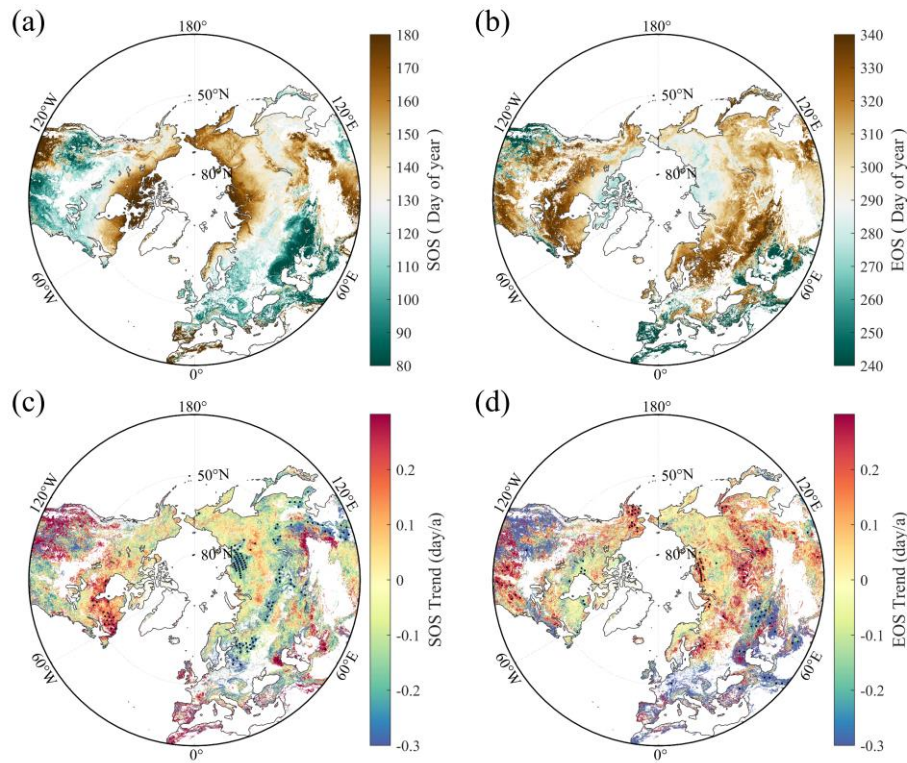

6 **Figure S2 Plant function type fraction at 0.5° spatial resolution.** (a) IBS, (b)  
7 TeBS, (c) BNS and (d) Shrubs.  
8

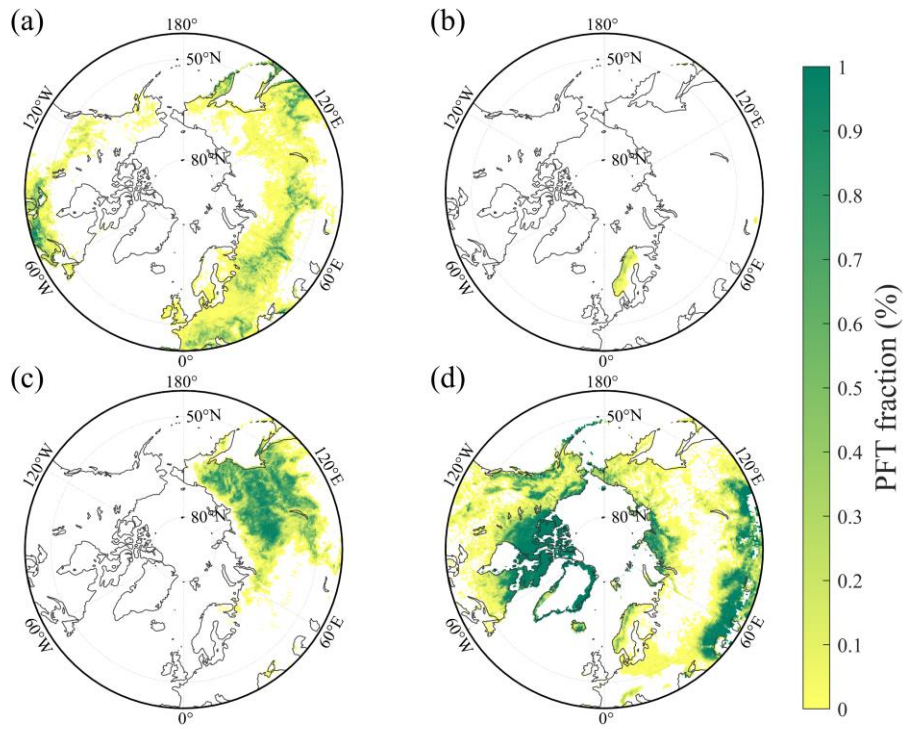

9 **Figure S3 Potential nature plant distribution simulated by LPJ-GUESS during**  
 10 **1979-2015. (a) Simulation with original phenological module, (b) simulation with**  
 11 **modified phenological module.**

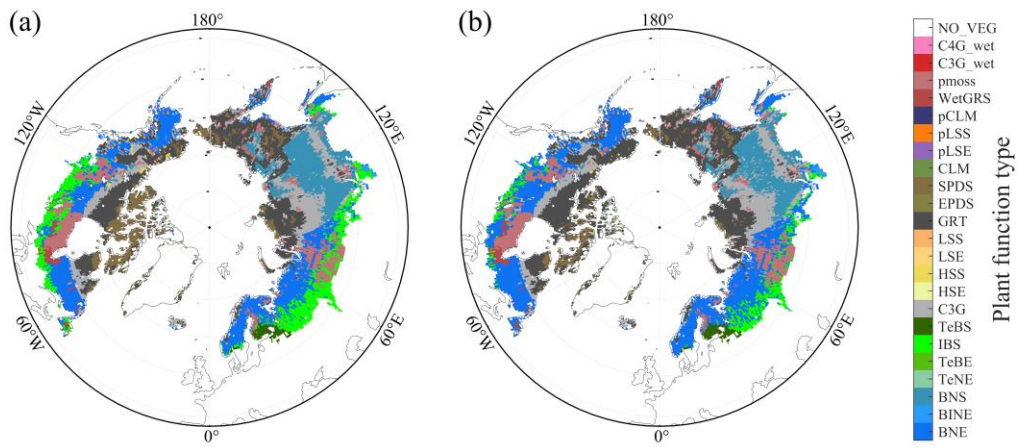

12

13 **Figure S4 Daily leaf area index simulation performance of LPJ-GUESS model**  
14 **using original and modified phenological module.**

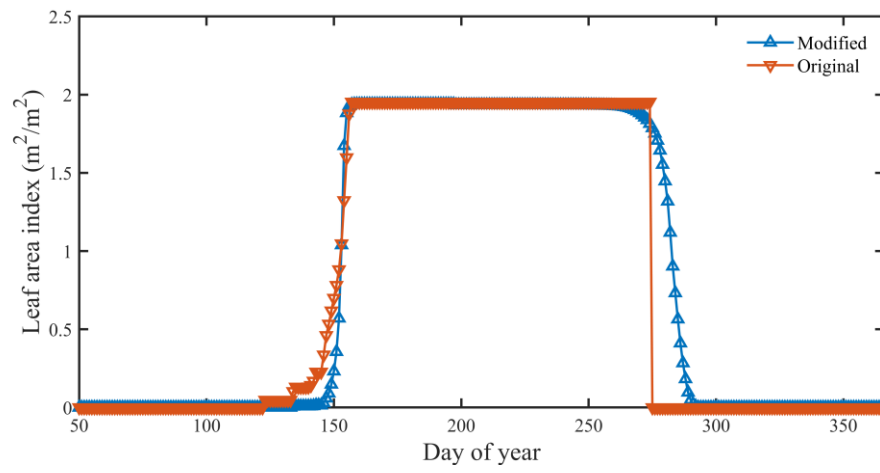

15  
16

17 **Figure S5 Frequency distributions of Spring (March to May) and Autumn (August to November) gross primary productivity (GPP) of LPJ-GUESS simulation and**  
 18 **VPM product. (a-c) Spring GPP for BNS, IBS&TeBS and Shrubs dominant regions.**  
 19 **VPM product. (a-c) Spring GPP for BNS, IBS&TeBS and Shrubs dominant regions.**  
 20 **(d-f) Autumn GPP for BNS, IBS&TeBS and Shrubs dominant regions.**

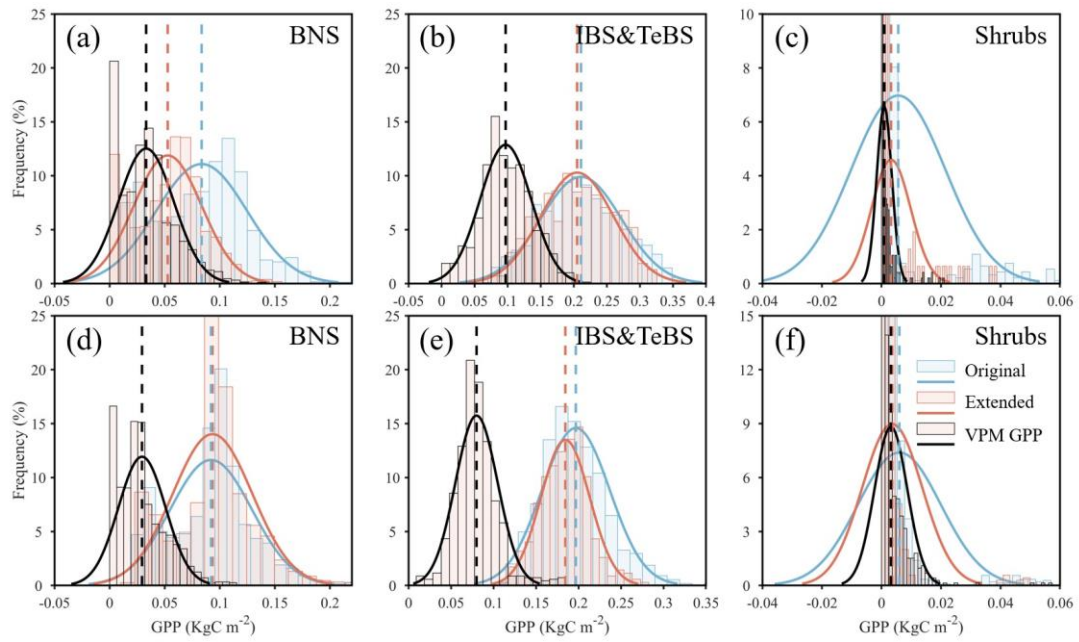

21

22 **TableS1 DROMPHOT model parameters.**

| Plant function type | DLcrit | Dcrit | Ccrit  | Fcrit | aD    | bD     | aC    | cC    | dF    | gT    | hDL   |
|---------------------|--------|-------|--------|-------|-------|--------|-------|-------|-------|-------|-------|
| BNS                 | 13.38  | 37.03 | 147.45 | 14.38 | 0.02  | -11.84 | -0.18 | 14.43 | -0.28 | 7.86  | 17.57 |
| IBS&TeBS            | 17.37  | 49.57 | 133.08 | 27.78 | -0.05 | -7.00  | -0.11 | 10.62 | -0.40 | 19.53 | 16.45 |
| Shrubs              | 10.74  | 90.11 | 107.31 | 21.20 | 0.31  | 10.71  | -0.36 | -6.12 | -0.26 | 17.38 | 16.40 |

23

24 **TableS2 DM model parameters.**

| Plant function type | Tb    | Pstart | Ycrit   | x    | y    | porn |
|---------------------|-------|--------|---------|------|------|------|
| BNS                 | 22.21 | 22.24  | 5365.79 | 2.15 | 3.09 | 0    |
| IBS&TeBS            | 39.12 | 16.42  | 8015.66 | 1.29 | 0.53 | 1    |
| Shrubs              | 13.20 | 19.76  | 1380.31 | 1.59 | 1.03 | 0    |

25
